# Supplementary material
Source: PubMed Central journal article supplement (PMC3542463)
Supplement: mmc1.pdf [file mmc1.pdf]

## Supplemental Information

### Exome Sequencing Identifies *INPPL1* Mutations

#### as a Cause of Opsismodyplasia

Céline Huber, Eissa Ali Faqeih, Deborah Bartholdi, Christine Bole-Feysot, Zvi Borochowitz, Denise Cavalcanti, Amandine Frigo, Patrick Nitschke, Joelle Roume, Heloísa G. Santos, Stavit A. Shalev, Andrea Superti-Furga, Anne-Lise Delezoide, Martine Le Merrer, Arnold Munnich, and Valérie Cormier-Daire

Table S1. Filtering Procedure for Bioinformatics Analysis

| Individuals  | Total Single Nucleotide variations | Variants in neither dbSNP, nor 1 000 genomes nor Exome Variant Server | Variants in neither “In-House” exomes | Variants in neither intergenic, nor intronic, non coding RNA, UTR splicing but essential splicing and Non-Synonymous variants (missense, nonsense, deletion and insertion) | Variants considering homozygote or heterozygote status of patients | Variants considering by SIFT or Polyphen as deleterious/damaging or unknown | Variants considering recessive genetic model |
|--------------|------------------------------------|-----------------------------------------------------------------------|---------------------------------------|----------------------------------------------------------------------------------------------------------------------------------------------------------------------------|--------------------------------------------------------------------|-----------------------------------------------------------------------------|----------------------------------------------|
| Fam 1 (csg)  | 67 593                             | 3 860                                                                 | 590                                   | 245                                                                                                                                                                        | 19                                                                 | 15                                                                          | 15                                           |
| Fam 2 (Ncsg) | 74 088                             | 4 830                                                                 | 1 945                                 | 420                                                                                                                                                                        | 395                                                                | 148                                                                         | 25                                           |
| Fam 3 (Ncsg) | 69 312                             | 3 656                                                                 | 896                                   | 191                                                                                                                                                                        | 179                                                                | 90                                                                          | 8                                            |
| Fam 1+2+3    | 14 870                             | 1 200                                                                 | 54                                    | 4                                                                                                                                                                          | 3                                                                  | 2                                                                           | 1                                            |
